# Supplementary material for: A new aspect of cyclopentadithiophene based polymers: narrow band gap polymers upon protonation
Source: Royal Society of Chemistry journal article supplement (doi:10.1039/c5cc04028k), 2015-01-01
Supplement: c5cc04028k1.pdf [file c5cc04028k1.pdf]

## Supporting Information

### **New Aspect of Cyclopentadithiophene Based Polymers: Narrow Band Gap Polymer upon Protonation**

Tao Tang <sup>a, c</sup>, Tingting Lin <sup>c</sup>, FuKe Wang <sup>\*b, c</sup>, and Chaobin He <sup>\*a, c</sup>

*Received (in XXX, XXX) Xth XXXXXXXXX 20XX, Accepted Xth XXXXXXXXX 20XX*

DOI: 10.1039/b000000x

#### **Experimental Details**

##### **Materials**

Compound 4H-cyclopenta[2,1-b:3,4-b']dithiophene (**CPDT**) was purchased from BOC Sciences while 9,9-dihexyl-2,7-dibromofluorene, N-Bromosuccinimide(97%), trifluoroacetic acid (99%) and biphenyl-4,4'-diboronic acid bis(pinacol) ester (95%) were purchased from Sigma-Aldrich. Compound 9,9-Di-n-hexylfluorene-2,7-diboronic acid bis(pinacol) ester and 2,6-Bis(4,4,5,5-tetramethyl-1,3,2-dioxaborolan-2-yl)-4,4-di(2-ethylhexyl)-4H-cyclopenta-[2,1-b:3,4-b']dithiophene were prepared by literature methods.<sup>1, 2</sup> Tetrahydrofuran (THF) was distilled from sodium benzophenone ketyl solution. Other commercially available solvents and reagents were used as received.

##### **Instrumentation**

<sup>1</sup>H-NMR (400.13 MHz) and <sup>13</sup>C-NMR (100.61 MHz) spectra were recorded on Bruker DRX 400-MHZ NMR spectrometer in the solvent of CDCl<sub>3</sub> at room temperature. Tetramethylsilane (TMS) was used as an internal standard to express chemical shift. Elemental analyses were conducted on a Flash EA 1112 series elemental analyzer for C, H and S determination. Gel permeation chromatography (GPC) was carried out on a Waters 2690 system with polystyrene as standards and THF (HPLC) as eluent. Thermogravimetry was conducted on TGA Q500 of TA system in air. A heating rate of 20 °C min<sup>-1</sup> and airflow of 50 cm<sup>3</sup> min<sup>-1</sup> were performed to test runs from room temperature to 900 °C. FT-IR spectra were recorded on PEKIN ELMER FT-IR Spectrometer Spectrum 2000. UV-vis-NIR spectra were conducted on Shimadzu UV-3600. Fluorescence Spectroscopy was conducted on RF-5301PC of Shimadzu.

##### **Simulation**

All calculations were performed with the Gaussian 09 program employing the Becke Three Parameter Hybrid Functionals Lee–Yang–Parr (B3LYP) in conjunction with the 6-31+G(d,p) basis set.<sup>3</sup> Full geometry optimizations without symmetry constraints were carried out in the gas phase for the singlet ground states (S<sub>0</sub>). The energies of highest occupied molecular orbital (HOMO), lowest unoccupied molecular orbital (LUMO) and other frontier orbitals were calculated at the optimized structure. The zero-point vibrational energies (ZPE) were scaled according to Wong (0.9804).<sup>4</sup> In all cases, the normal modes revealed no imaginary frequencies indicating that they represent minima on the potential energy surface.

##### **Synthesis of Compounds and Polymers**

**5,5'-(9,9-dihexyl-9H-fluorene-2,7-diyl)bis(2-bromo-3-methylthiophene) (1).** To a two necked 100 ml RBF was added 2,7-dibromo-9,9-dihexyl-9H-fluorene (0.984 g, 2 mmol) and 4,4,5,5-tetramethyl-2-(4-methylthiophen-2-yl)-1,3,2-dioxaborolane (0.941 g, 4.2 mmol), 16 ml of THF, 8 ml of Na<sub>2</sub>CO<sub>3</sub> solution (2 M), and four drops of Aliquat 336 under argon protection. The mixture was then degassed for half hour under argon. Catalytic amount of Pd(PPh<sub>3</sub>)<sub>4</sub> (9.7 mg, 0.0084 mmol) was added and another 20 mins degas was applied. The mixture was then transferred to an oil bath and stirred and refluxed at 80 °C for 18 hours. After cooling, the reaction mixture was extracted with CH<sub>2</sub>Cl<sub>2</sub> and the organic layers were collected, washed with water (three times) and dried over magnesium sulfate. After filtration, the volatile CH<sub>2</sub>Cl<sub>2</sub> and THF were removed through rotary evaporator. The crude product was chromatographed on silica using ethyl acetate : hexane (1:30, v:v) as eluent, followed by recrystallization in hexane. This was obtained as yellow crystals (75%). The above product (1.24 g, 2.36 mmol) was dissolved in 40 ml THF under argon atmosphere at 0 °C with the absence of light. NBS (0.88 g, 4.9 mmol) was added to the solution as one portion. The mixture was reacted under argon at 0 °C for 1 hour and then stirred at room temperature for 7 hours. Then the reaction was stopped by addition of water and extracted with CH<sub>2</sub>Cl<sub>2</sub> (15 ml x 3). The organic layers were combined and washed with 30 ml water (three times) and dried over magnesium sulfate. After filtration, the volatile THF and CH<sub>2</sub>Cl<sub>2</sub> were removed through rotary evaporator. The crude product was chromatographed on silica using ethyl acetate : hexane (1:60, v:v) as eluant. This was obtained as light yellow solid (99%). <sup>1</sup>H-NMR (δ, CDCl<sub>3</sub>): 7.69 (d, 2 H), 7.48 (m, 4 H), 7.06 (s, 2 H), 2.23 (s, 6 H), 1.98 (m, 4 H), 1.04 (m, 12 H), 1.75 (m, 10H).

**P1.** To a two necked RBF of 50 ml was added 2,2'-(4,4-bis(2-ethylhexyl)-4H-cyclopenta[1,2-b:5,4-b']dithiophene-2,6-diyl)bis(4,4,5,5-tetramethyl-1,3,2-dioxaborolane) (0.3 g, 0.46 mmol), 2,7-dibromo-9,9-dihexyl-9H-fluorene (0.224 g, 0.46 mmol), 8 ml of toluene, 4 ml of Na<sub>2</sub>CO<sub>3</sub> solution (2 M), and one drop of Aliquat 336 under argon protection. The mixture was then vacuum degassed through several freeze-pump-thaw cycles. Catalytic amount of Pd(PPh<sub>3</sub>)<sub>4</sub> (2.1 mg, 0.0018mmol) was added and one more freeze-pump-thaw degas cycle was applied. The mixture was then transferred to an oil bath and stirred and refluxed at 110 °C for 3 days. After the polymerization completed, the reaction mixture was poured into excess amount of methanol with stirring. The collected green precipitates were re-dissolved into toluene and precipitated from methanol. The process was repeated several times until purify of polymer is satisfied. Finally the polymers were dried in a vacuum oven and then directed used for the following characterization. Yield: 71%, Mn= 7029, PDI= 1.31. <sup>1</sup>H-NMR (δ, CDCl<sub>3</sub>): 7.72 (m, 4 H), 7.56 (m, 4 H), 1.98 (m, 8 H), 1.66 (m, 4 H), 1.09-0.70 (m, 48 H). <sup>13</sup>C NMR: δ 158.1, 152.1, 142.1, 140.6, 137.3, 136.7, 134.7, 133.9, 133.3, 132.3, 132.2, 132.1, 129.0, 128.9, 127.8, 125.7, 125.2, 124.9, 121.0, 120.5, 120.3, 120.0, 55.7, 54.5, 43.7, 40.9, 36.2, 35.6, 34.8, 31.9, 30.1, 29.2, 27.9, 24.2, 23.3, 23.0, 16.2, 14.5, 14.4. FTIR (KBr): 3420.5, 3063.9, 2953.4, 2922.9, 2851.1, 2316.9, 1601.8, 1507.9, 1462.8, 1434.9, 1376.2, 1254.8, 1179.2, 1117.0, 874.0, 814.7, 744.6, 719.6, 692.6, 551.7, 438.8, 425.2. Anal Calcd for C<sub>50</sub>H<sub>70</sub>S<sub>2</sub>: C, 81.68; H, 9.60; S, 8.72. Found: C, 80.69; H, 8.84; S, 8.28%.

**P2.** To a two necked RBF of 50 ml was added 2,6-dibromo-4,4-bis(2-ethylhexyl)-4H-cyclopenta[1,2-b:5,4-b']dithiophene (0.34 g, 0.61 mmol), biphenyl-4,4''-diboronic acid bis(pinacol) ester (0.25 g, 0.61 mmol), 8 ml of toluene, 4 ml of Na<sub>2</sub>CO<sub>3</sub> solution (2 M), and one drop of Aliquat 336 under argon protection. The mixture was then vacuum degassed through several freeze-pump-thaw cycles. Catalytic amount of Pd(PPh<sub>3</sub>)<sub>4</sub> (2.8 mg, 0.0024mmol) was added and one more freeze-pump-thaw degas cycle was applied. The mixture was then transferred to an oil bath and stirred and refluxed at 110 °C for 3 days. After the polymerization completed, the reaction mixture was poured into excess amount of methanol with stirring. The collected green precipitates were re-dissolved into toluene and precipitated from methanol. The process was repeated several times until purify of polymer is satisfied. Finally the polymers were dried in a vacuum oven and then directed used for the following characterization. Yield: 75%, Mn=

15465, PDI= 2.  $^1\text{H-NMR}$  ( $\delta$ ,  $\text{CDCl}_3$ ): 7.35 (m, 10 H), 1.95 (m, 4 H), 0.99-0.57 (m, 30 H).  $^{13}\text{C NMR}$ :  $\delta$  158.6, 144.5, 139.1, 138.2, 135.1, 132.3, 129.0, 127.7, 126.3, 118.9, 54.1, 43.6, 35.4, 34.7, 28.8, 27.8, 23.4, 14.6, 10.8. FTIR (KBr): 3429.7, 3028.8, 2953.3, 2919.1, 2869.2, 2329.0, 1603.3, 1508.1, 1485.8, 1456.9, 1413.6, 1376.6, 1178.2, 1110.5, 1001.0, 815.9, 726.5, 667.7, 494.9. Anal Calcd for  $\text{C}_{37}\text{H}_{46}\text{S}_2$ : C, 80.09; H, 8.36; S, 11.56. Found: C, 78.26; H, 7.52; S, 10.74%.

**P3.** To a two necked RBF of 50 ml was added 2,2'-(4,4-bis(2-ethylhexyl)-4H-cyclopenta[1,2-b:5,4-b']dithiophene-2,6-diyl)bis(4,4,5,5-tetramethyl-1,3,2-dioxaborolane) (0.37 g, 0.56 mmol), 5,5'-(9,9-dihexyl-9H-fluorene-2,7-diyl)bis(2-bromo-3-methylthiophene) (**1**, 0.385 g, 0.56 mmol), 8 ml of toluene, 4 ml of  $\text{Na}_2\text{CO}_3$  solution (2 M), and one drop of Aliquat 336 under argon protection. The mixture was then vacuum degassed through several freeze-pump-thaw cycles. Catalytic amount of  $\text{Pd}(\text{PPh}_3)_4$  (2.6 mg, 0.0022mmol) was added and one more freeze-pump-thaw degas cycle was applied. The mixture was then transferred to an oil bath and stirred and refluxed at 110 °C for 3 days. After the polymerization completed, the reaction mixture was poured into excess amount of methanol with stirring. The collected yellow precipitates were re-dissolved into toluene and precipitated from methanol. The process was repeated several times until purify of polymer is satisfied. Finally the polymers were dried in a vacuum oven and then directed used for the following characterization. Yield: 66%,  $M_n$ = 11265, PDI= 1.35.  $^1\text{H-NMR}$  ( $\delta$ ,  $\text{CDCl}_3$ ): 7.68 (m, 6 H), 7.21 (s, 2H), 7.07 (s, 2H), 2.46 (m, 6H), 2.02 (m, 8 H), 1.65 (m, 4H), 1.06-0.66 (m, 48 H).  $^{13}\text{C NMR}$ :  $\delta$  158.6, 144.5, 139.1, 138.2, 135.1, 132.3, 129.0, 127.7, 126.3, 118.9, 54.1, 43.6, 35.4, 34.7, 28.8, 27.8, 23.4, 14.6, 10.8. FTIR (KBr): 3429.2, 3056.1, 2951.7, 2918.2, 2849.3, 2318.1, 1636.9, 1576.9, 1455.9, 1417.9, 1375.0, 1257.2, 1176.4, 1131.1, 879.5, 832.0, 812.5, 719.7, 667.1, 617.6, 589.4, 522.8. Anal Calcd for  $\text{C}_{60}\text{H}_{78}\text{S}_4$ : C, 77.70; H, 8.48; S, 13.83. Found: C, 75.39; H, 8.12; S, 13.88%.

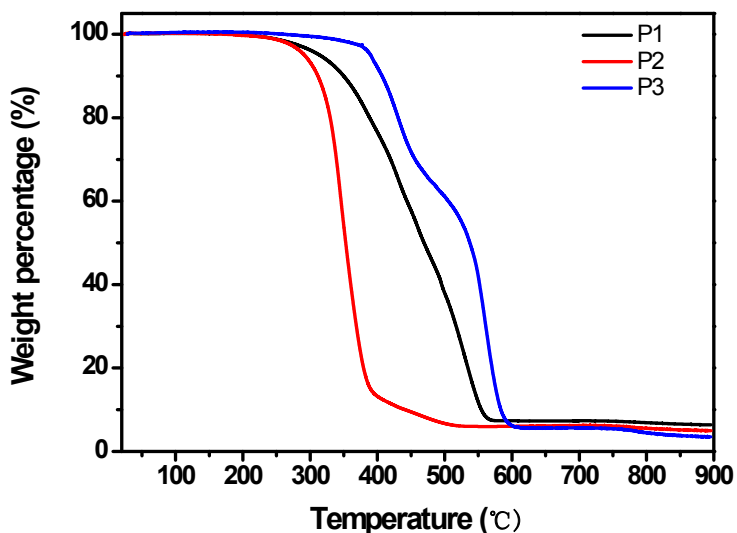

**Fig. S1** TGA plots of polymers in air.

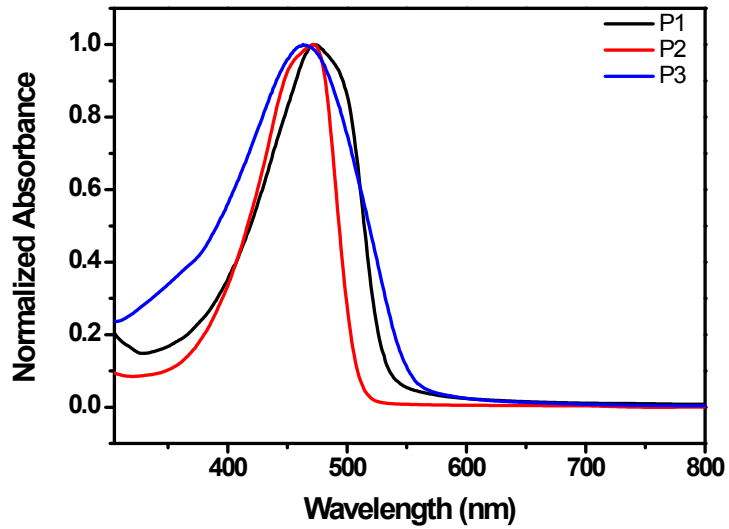

Fig. S2 UV-vis spectra of the obtained polymers in chloroform solution.

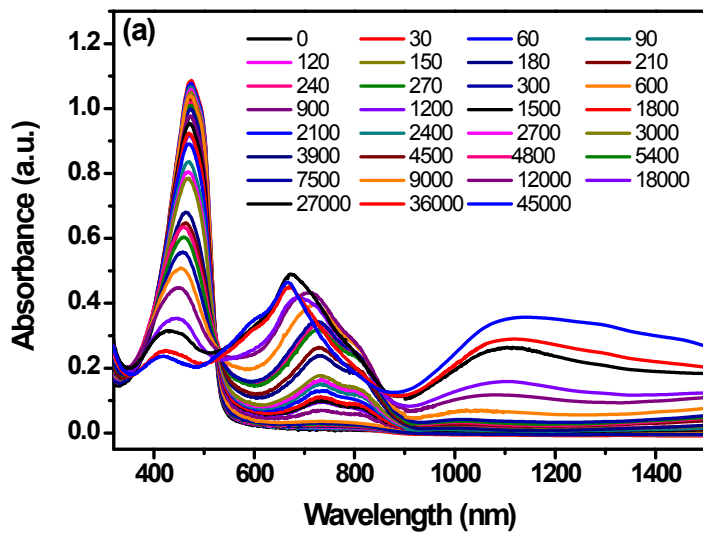

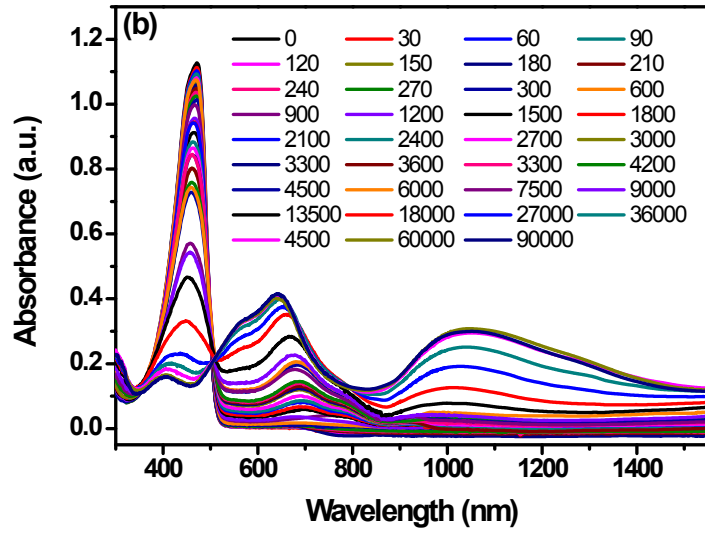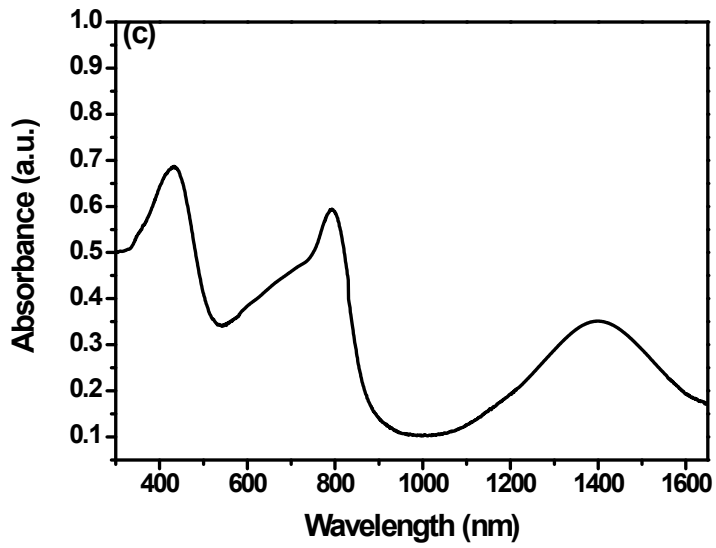

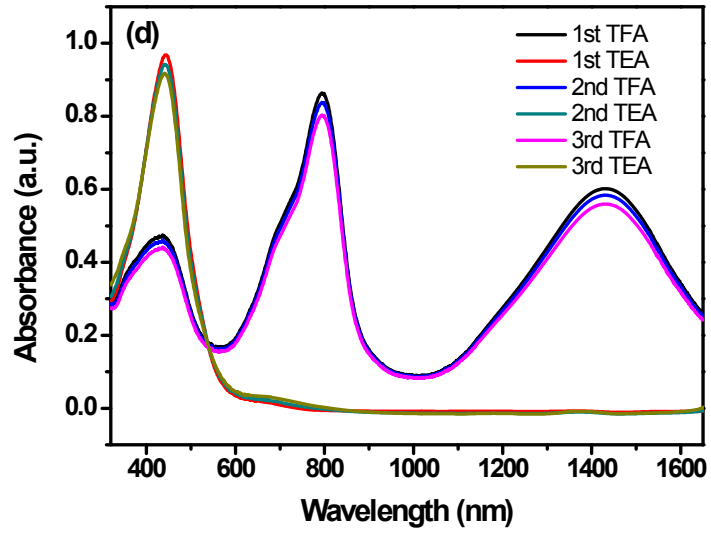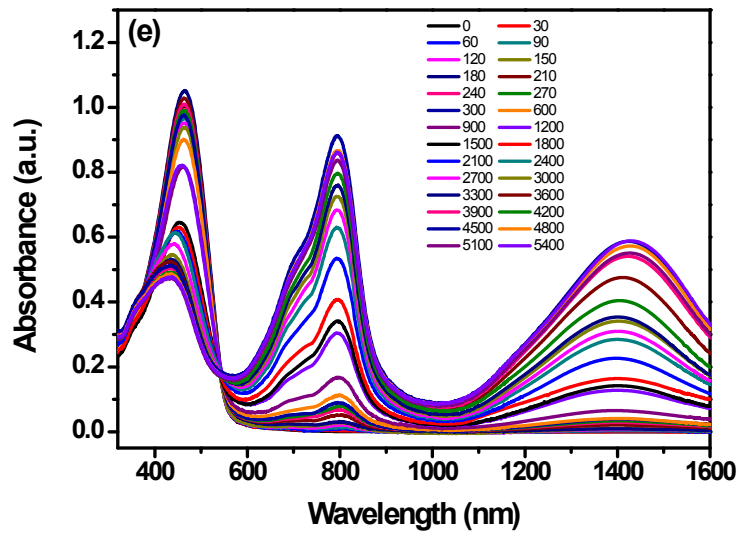

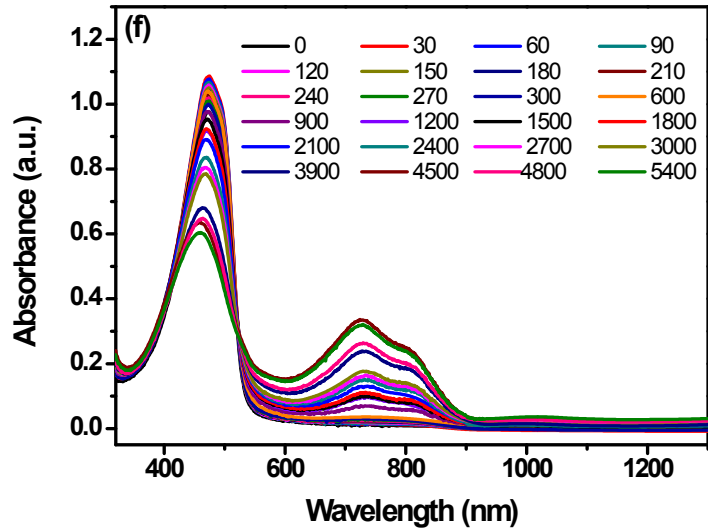

**Fig. S3** (a) UV-vis-NIR spectra of the polymer **P1** as a function of TFA concentration (ppm) in chloroform solution at room temperature; (b) UV-vis-NIR spectra of the polymer **P2** as a function of TFA concentration (ppm) in chloroform solution at room temperature; (c) UV-vis-NIR spectra of the polymer **P3** in chloroform/ methanesulfonic acid (v/v: 99/1) solution at room temperature; (d) Reversible UV-vis-NIR spectra of the polymer **P3** in chloroform upon the treatment of TFA and then TEA for three cycles; (e) UV-vis-NIR spectra of the polymer **P3** as a function of TFA concentration (up to 5400 ppm) in chloroform solution at room temperature and (f) UV-vis-NIR spectra of the polymer **P1** as a function of TFA concentration (up to ppm) in chloroform solution at room temperature.

(a)

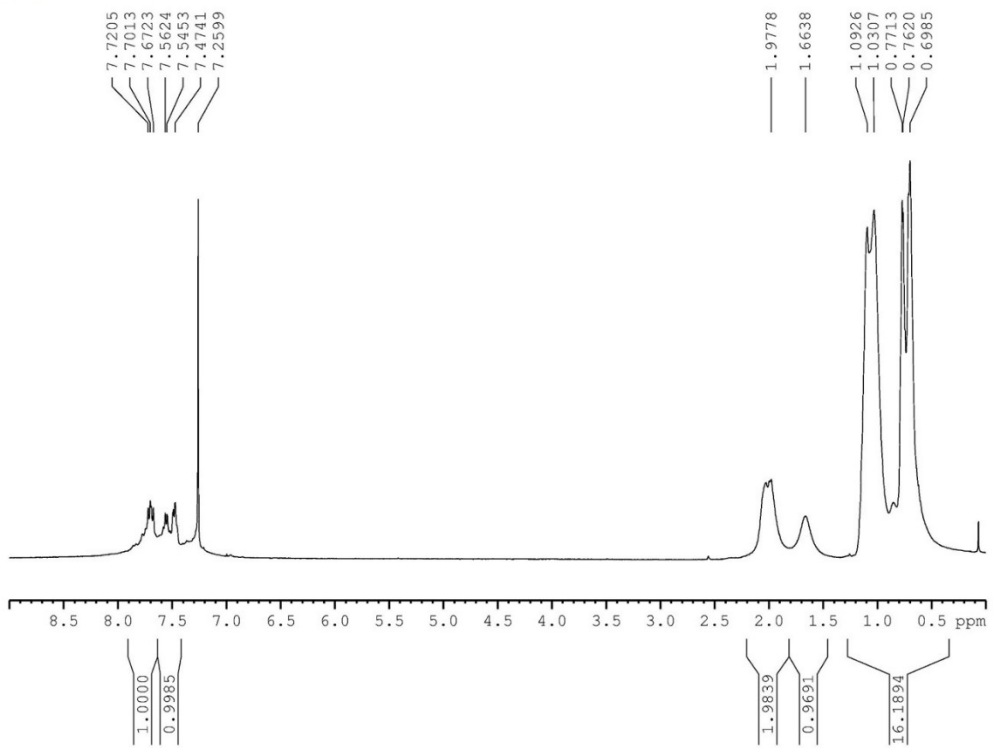



(b)

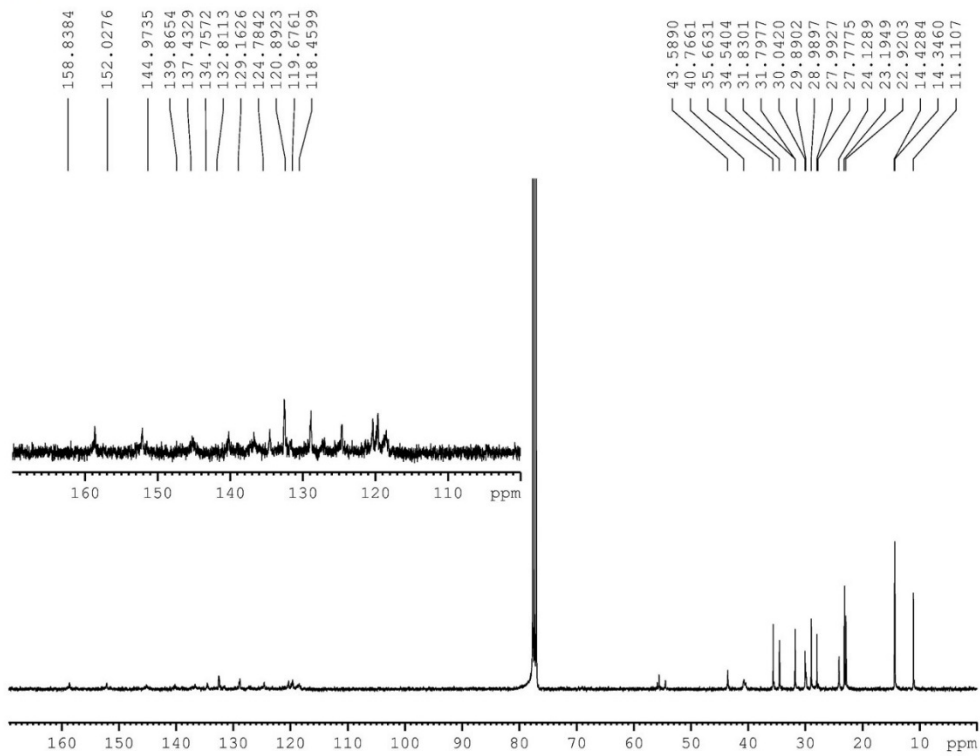

(c)

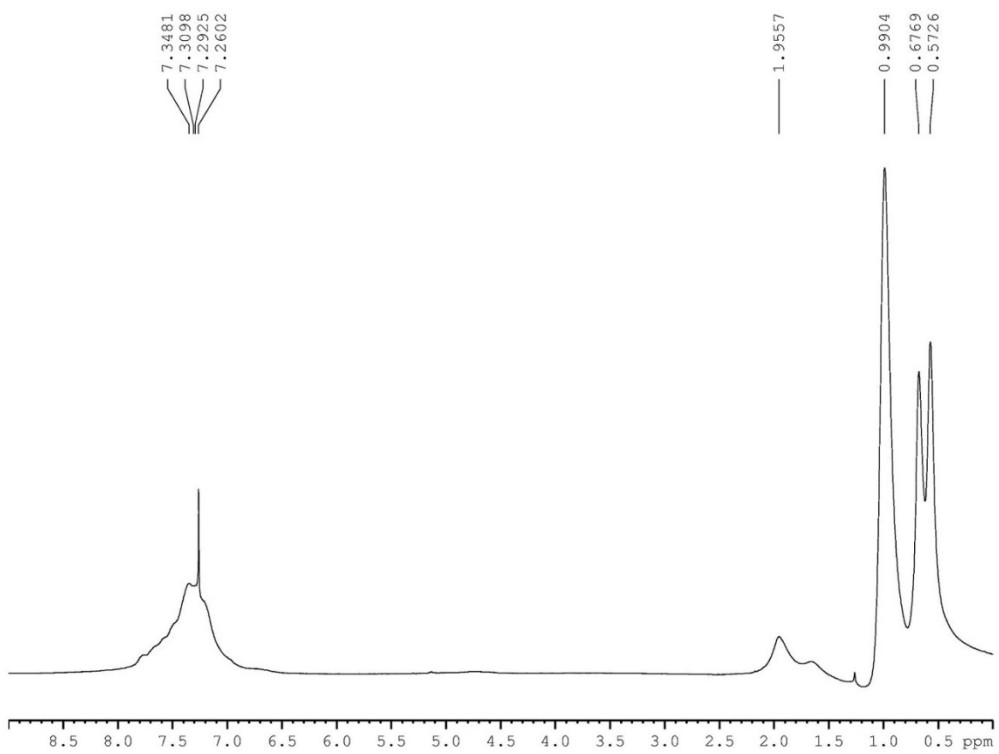

(d)

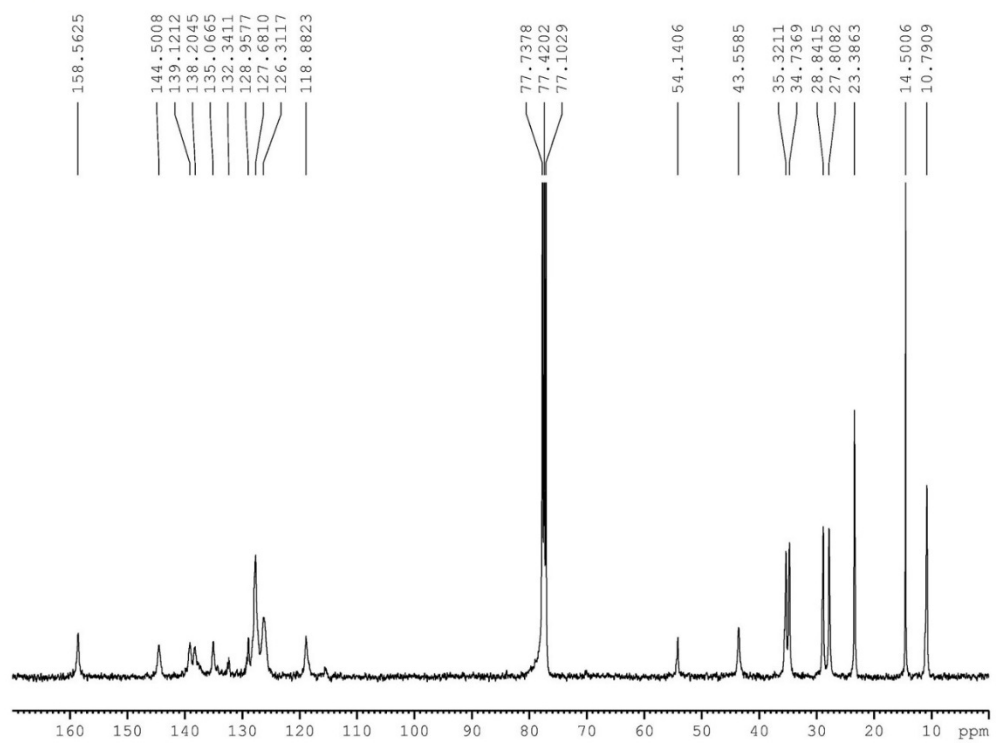

(e)

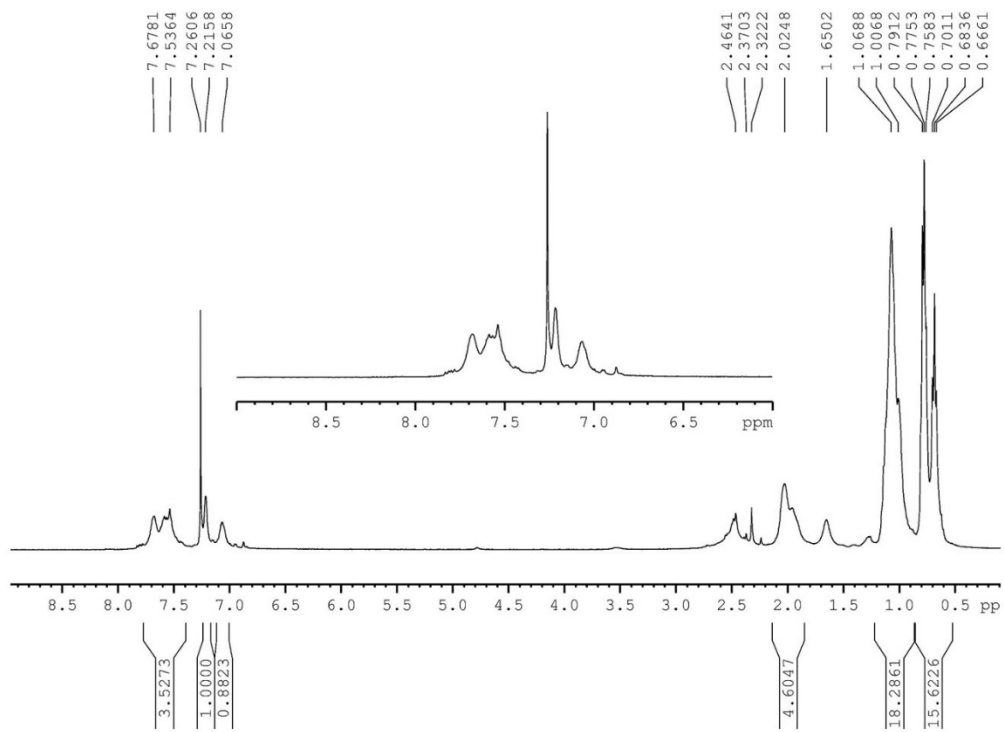

(f)

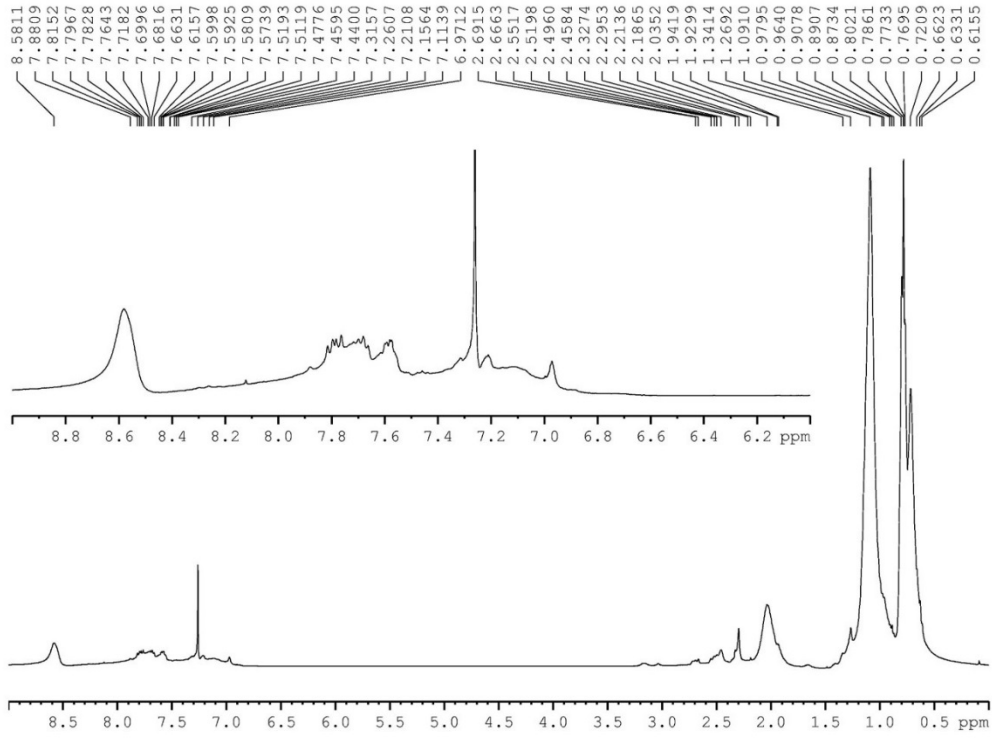

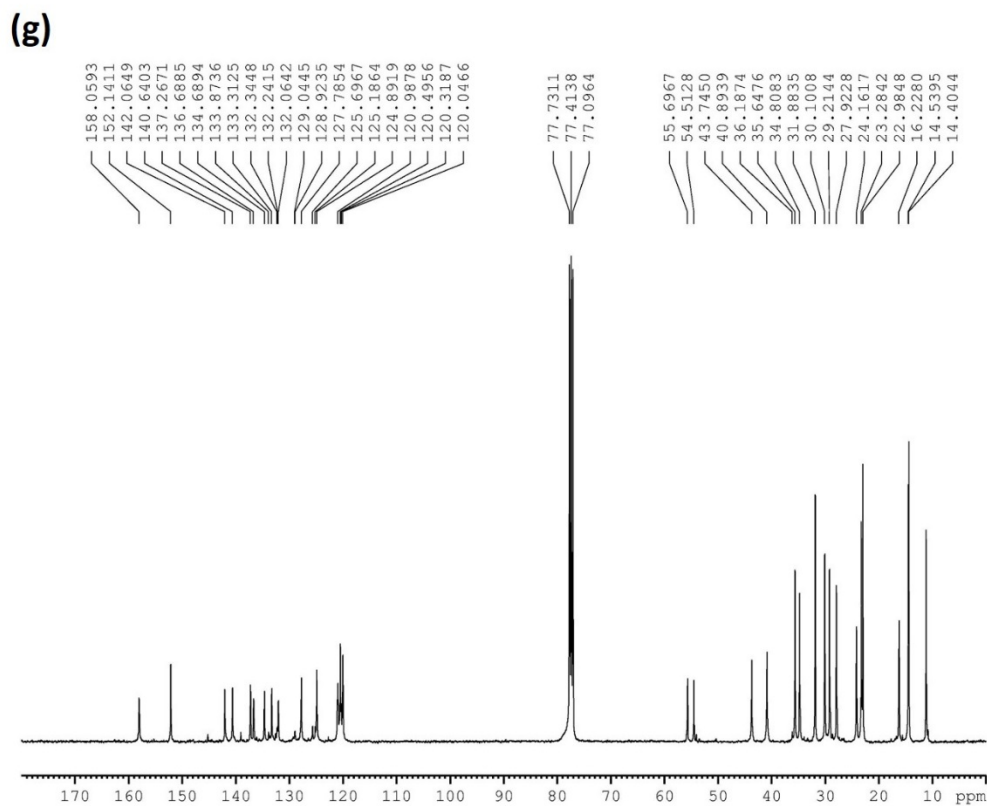

**Fig. S4** NMR spectra of polymers. (a) and (b),  $^1\text{H}$ -NMR and  $^{13}\text{C}$ -NMR spectra of polymer **P1** in  $\text{CDCl}_3$ ; (c) and (d),  $^1\text{H}$ -NMR and  $^{13}\text{C}$ -NMR spectra of polymer **P2** in  $\text{CDCl}_3$ ; (e) and (g),  $^1\text{H}$ -NMR and  $^{13}\text{C}$ -NMR spectra of polymer **P3** in  $\text{CDCl}_3$ ; (f)  $^1\text{H}$ -NMR spectra of polymer **P3** in  $\text{CDCl}_3$  with 5% trifluoroacetic acid-d.

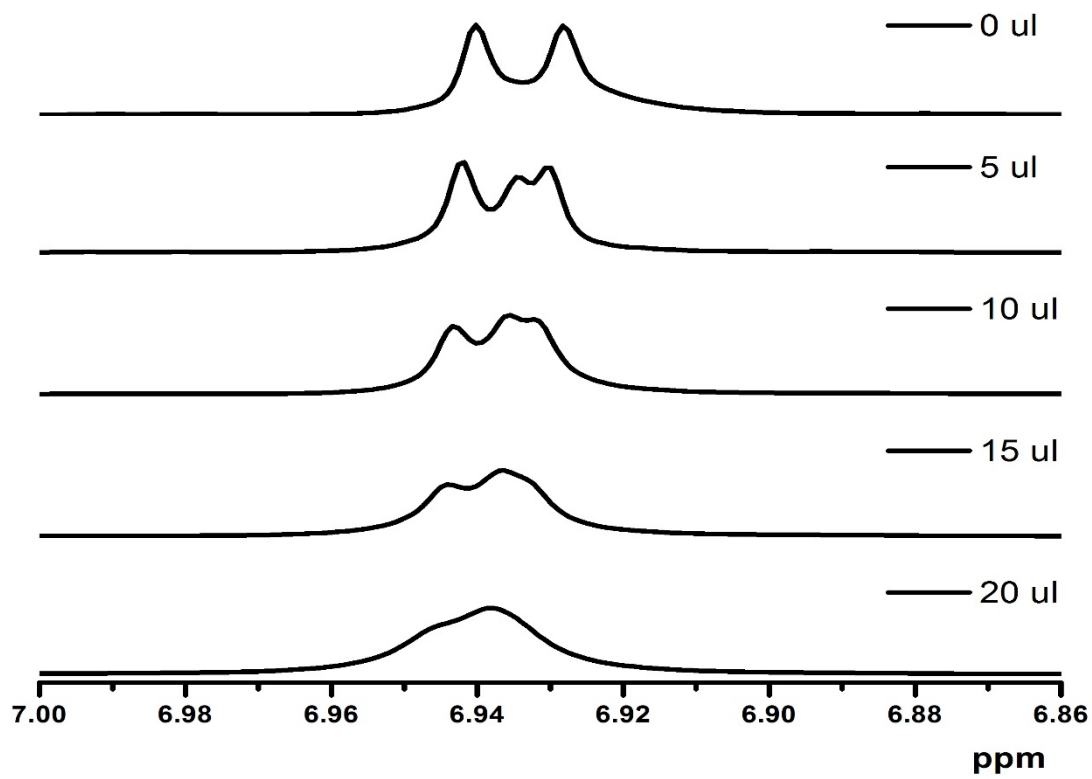

**Fig. S5** Aromatic regions (6.86 – 7 ppm) of the  $^1\text{H}$  NMR spectra of **CPDT** as a function of trifluoroacetic acid-d concentration from 0 to 20  $\mu\text{l}$  at 300 K. All spectra were recorded in  $\text{CDCl}_3$

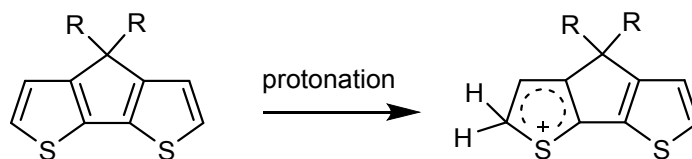

**Scheme S1** The process of protonation of **CPDT** with TFA.

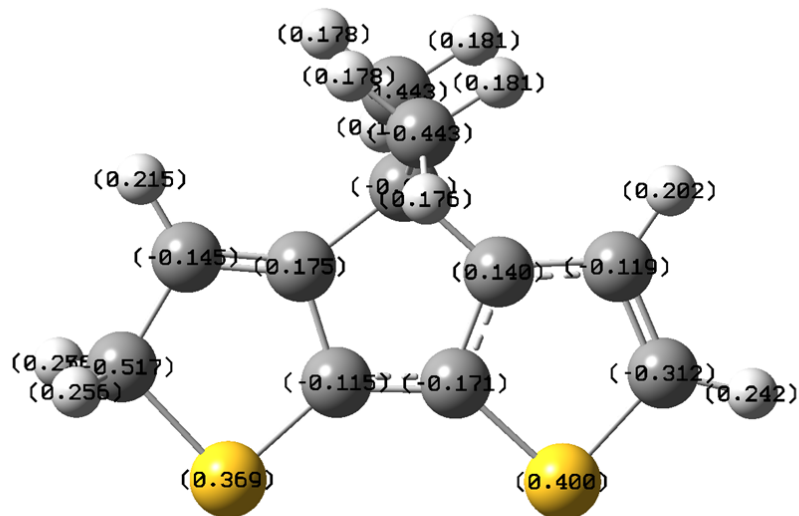

**Fig. S6** Computer simulation results of the protonated CPDT.

1 G. L. Gibson, T. M. McCormick and D. S. Seferos, *J. Am. Chem. Soc.*, 2011, **134**, 539.

2 R. Grisorio, G. Allegretta, P. Mastrorilli and G. P. Suranna, *Macromolecules*, 2011, **44**, 7977.

3 G. W. T. M. J. Frisch, H. B. Schlegel, G. E. Scuseria, M. A. Robb, J. R. Cheeseman, G. Scalmani, V. Barone, B. Mennucci, G. A. Petersson, H. Nakatsuji, M. Caricato, X. Li, H. P. Hratchian, A. F. Izmaylov, J. Bloino, G. Zheng, J. L. Sonnenberg, M. Hada, M. Ehara, K. Toyota, R. Fukuda, J. Hasegawa, M. Ishida, T. Nakajima, Y. Honda, O. Kitao, H. Nakai, T. Vreven, J. A. Montgomery, Jr., J. E. Peralta, F. Ogliaro, M. Bearpark, J. J. Heyd, E. Brothers, K. N. Kudin, V. N. Staroverov, R. Kobayashi, J. Normand, K. Raghavachari, A. Rendell, J. C. Burant, S. S. Iyengar, J. Tomasi, M. Cossi, N. Rega, J. M. Millam, M. Klene, J. E. Knox, J. B. Cross, V. Bakken, C. Adamo, J. Jaramillo, R. Gomperts, R. E. Stratmann, O. Yazyev, A. J. Austin, R. Cammi, C. Pomelli, J. W. Ochterski, R. L. Martin, K. Morokuma, V. G. Zakrzewski, G. A. Voth, P. Salvador, J. J. Dannenberg, S. Dapprich, A. D. Daniels, Ö. Farkas, J. B. Foresman, J. V. Ortiz, J. Cioslowski, and D. J. Fox, *Gaussian, Inc.*, Wallingford CT, **2009**.

4 M. W. Wong, *Chem. Phys. Lett.*, 1996, **256**, 391.
